# Supplementary material for: Theoretical study of mechanisms for the hydrolytic deamination of cytosine via steered molecular dynamic simulations
Source: Royal Society of Chemistry journal article supplement (doi:10.1039/c8ra07390b), 2018-01-01
Supplement: c8ra07390b1.pdf [file c8ra07390b1.pdf]

## Supporting Information

(Total pages: 8)

### **Theoretical study of mechanisms for the hydrolytic deamination of cytosine via steered molecular dynamic simulations**

S. Tolosa\*, J.A. Sansón, A. Hidalgo

*Departamento de Ingeniería Química y Química Física,  
Universidad de Extremadura, Badajoz, Spain.*

\* Corresponding author: [santi@unex.es](mailto:santi@unex.es)

**Table S1**

Cartesian coordinates of the reactant (in Å), intermediate, transition states and product geometries obtained by electronic structure calculations at PCM-M06-2X/6-311++G(d,p) level of all the mechanisms studied.

| <b>C-W structure. Reactive</b> |           |           |           |
|--------------------------------|-----------|-----------|-----------|
| N                              | 1.965637  | 0.425248  | -0.013735 |
| C                              | 2.040429  | -0.928075 | 0.011605  |
| H                              | 3.033997  | -1.355653 | 0.031185  |
| C                              | 0.913191  | -1.672818 | 0.011786  |
| H                              | 0.943449  | -2.751522 | 0.031612  |
| C                              | -0.327708 | -0.952376 | -0.016152 |
| N                              | -1.486547 | -1.624331 | -0.019833 |
| H                              | -1.501295 | -2.630316 | 0.003851  |
| H                              | -2.360222 | -1.110237 | -0.029736 |
| N                              | -0.385931 | 0.376944  | -0.040642 |
| C                              | 0.754004  | 1.120248  | -0.040834 |
| O                              | 0.768568  | 2.345680  | -0.062800 |
| H                              | 2.806636  | 0.986233  | -0.014472 |
| O                              | -3.143316 | 0.853527  | -0.157622 |
| H                              | -3.529652 | 1.364581  | 0.558252  |
| H                              | -2.175022 | 0.976408  | -0.085751 |

**Table S2**

Cartesian coordinates (in Å) obtained from SMD simulations for intermediate and transition states of all the mechanisms studied.

| <b>A-pathway. TS1a structure</b> |            |            |            |
|----------------------------------|------------|------------|------------|
| N                                | 22.4160004 | 18.5189991 | 21.5569992 |
| C                                | 22.1119995 | 17.1450005 | 21.3670006 |
| H                                | 22.9309998 | 16.5060005 | 21.4080009 |
| C                                | 20.9489994 | 16.7770004 | 20.8689995 |
| H                                | 20.6320000 | 15.7290001 | 20.7110004 |
| C                                | 20.0030003 | 17.8409996 | 20.5279999 |
| N                                | 18.7560005 | 17.6529999 | 20.1720009 |
| H                                | 18.4480000 | 16.6739998 | 20.0410004 |
| H                                | 18.3689995 | 18.8080006 | 19.8799992 |
| N                                | 20.4239998 | 19.1900005 | 20.5760002 |
| C                                | 21.5429993 | 19.5240002 | 21.2010002 |
| O                                | 21.8320007 | 20.6410007 | 21.6480007 |
| H                                | 23.3519993 | 18.7240009 | 21.9820004 |
| O                                | 18.2000008 | 19.9689999 | 19.5930004 |
| H                                | 17.3330002 | 20.3649998 | 19.9400005 |
| H                                | 19.4680004 | 19.8610001 | 20.1529999 |

| <b>A-pathway. IIa structure</b> |            |            |            |
|---------------------------------|------------|------------|------------|
| N                               | 21.9389992 | 18.4559994 | 22.5930004 |
| C                               | 22.3299999 | 17.7409992 | 21.5330009 |
| H                               | 23.1350002 | 17.0030003 | 21.2830009 |
| C                               | 21.4039993 | 17.9759998 | 20.5400009 |
| H                               | 21.3239994 | 17.3980007 | 19.6329994 |
| C                               | 20.1259995 | 18.7290001 | 20.6770000 |
| N                               | 19.3320007 | 18.8409996 | 19.5079994 |
| H                               | 19.6250000 | 18.2670002 | 18.7329998 |
| H                               | 17.8239994 | 20.2689991 | 20.1550007 |
| N                               | 19.9239998 | 19.4850006 | 21.8090000 |
| C                               | 20.7830009 | 19.3069992 | 22.8020000 |
| O                               | 20.6520004 | 19.8969994 | 23.8999996 |
| H                               | 22.5410004 | 18.2339993 | 23.4120007 |
| O                               | 17.3619995 | 19.7560005 | 20.9290009 |
| H                               | 16.3950005 | 19.9599991 | 21.0860004 |
| H                               | 19.0139999 | 19.7490005 | 22.1660004 |

### A-pathway. TS2a structure

|   |            |            |            |
|---|------------|------------|------------|
| N | 18.8139992 | 21.0660000 | 25.0890007 |
| C | 20.0949993 | 20.7639999 | 25.4960003 |
| H | 20.4939995 | 21.3920002 | 26.4279995 |
| C | 21.0550003 | 20.3999996 | 24.5410004 |
| H | 22.0370007 | 20.3869991 | 25.1450005 |
| C | 20.5799999 | 20.0300007 | 23.2159996 |
| N | 21.3299999 | 19.4769993 | 22.1079998 |
| H | 22.3090000 | 19.7070007 | 22.3409996 |
| H | 20.9200001 | 18.3929996 | 22.2229996 |
| N | 19.2390003 | 20.3610001 | 22.8700008 |
| C | 18.2880001 | 20.6399994 | 23.8560009 |
| O | 17.0979996 | 20.6140003 | 23.6739998 |
| H | 17.9890003 | 21.3530006 | 25.7740002 |
| O | 19.9860001 | 18.0590000 | 23.3589993 |
| H | 20.5370007 | 17.5289993 | 23.9939995 |
| H | 19.0139999 | 19.7490005 | 22.1660004 |

### A-path. I2a structure

|   |            |            |            |
|---|------------|------------|------------|
| N | 16.1369991 | 21.4549999 | 22.2940006 |
| C | 15.5900002 | 20.8549995 | 23.3260002 |
| H | 14.5620003 | 21.1140003 | 23.6270008 |
| C | 16.3250008 | 20.0820007 | 24.2310009 |
| H | 15.9770002 | 19.6250000 | 25.1429996 |
| C | 17.6620007 | 19.6730003 | 23.9440002 |
| N | 18.6030006 | 19.5930004 | 25.1930008 |
| H | 18.0620003 | 19.6970005 | 26.0559998 |
| H | 19.4519997 | 20.0939999 | 25.0939999 |
| N | 18.2430000 | 20.3959999 | 22.8369999 |
| C | 17.4640007 | 21.1079998 | 21.9309998 |
| O | 17.7880001 | 21.4729996 | 20.8899994 |
| H | 15.8710003 | 22.2180004 | 21.7110004 |
| O | 17.7049999 | 18.2099991 | 23.6760006 |
| H | 18.4850006 | 17.8059998 | 24.1989994 |
| H | 19.0300007 | 20.0330009 | 22.2619991 |

**A-pathway. TS3a structure**

|   |            |            |            |
|---|------------|------------|------------|
| N | 19.1049995 | 21.6180000 | 22.4120007 |
| C | 18.2929993 | 21.3530006 | 23.4589996 |
| H | 17.7999992 | 22.2140007 | 23.7999992 |
| C | 18.2619991 | 20.0139999 | 23.9220009 |
| H | 17.5830002 | 19.7460003 | 24.6630001 |
| C | 19.0179996 | 18.8430004 | 23.2970009 |
| N | 20.2919998 | 18.1959991 | 24.3549995 |
| H | 20.2189999 | 18.3649998 | 25.4629993 |
| H | 21.3910007 | 18.3759995 | 24.0650005 |
| N | 19.6739998 | 19.3460007 | 22.0690002 |
| C | 19.7339993 | 20.6560001 | 21.7950001 |
| O | 20.5349998 | 21.0569992 | 20.8640003 |
| H | 19.0459995 | 22.5489998 | 21.9720001 |
| O | 18.3969994 | 17.5909996 | 23.1949997 |
| H | 19.3859997 | 17.3020000 | 24.0590000 |
| H | 20.4029999 | 18.7000008 | 21.6060009 |

**A-pathway. U-A structure. Product**

|   |            |            |            |
|---|------------|------------|------------|
| N | 20.1520004 | 18.3959999 | 21.1700001 |
| C | 19.8050003 | 17.0400009 | 21.1520004 |
| H | 20.3260002 | 16.3859997 | 21.8209991 |
| C | 18.8670006 | 16.6070004 | 20.2590008 |
| H | 18.7049999 | 15.5489998 | 20.1879997 |
| C | 18.3250008 | 17.4979992 | 19.2409992 |
| N | 17.4279995 | 13.6190004 | 18.8479996 |
| H | 17.5610008 | 14.6709995 | 18.7409992 |
| H | 16.8379993 | 13.4709997 | 19.6809998 |
| N | 18.6030006 | 18.8439999 | 19.4099998 |
| C | 19.5070000 | 19.3369999 | 20.3390007 |
| O | 19.7859993 | 20.5680008 | 20.3920002 |
| H | 20.8980007 | 18.6849995 | 21.7759991 |
| O | 17.5580006 | 17.1580009 | 18.3400002 |
| H | 16.8220005 | 13.2849998 | 18.1359997 |
| H | 18.1959991 | 19.5960007 | 18.8129997 |

### **B-pathway. TS1b structure**

|   |            |            |            |
|---|------------|------------|------------|
| N | 22.4529991 | 17.2010002 | 21.8579998 |
| C | 21.7730007 | 16.1140003 | 22.3099995 |
| H | 21.9899998 | 15.5139999 | 23.2819996 |
| C | 20.5440006 | 15.7950001 | 21.6910000 |
| H | 20.0000000 | 14.8669996 | 21.9680004 |
| C | 20.0709991 | 16.7350006 | 20.6770000 |
| N | 18.2290001 | 17.4960003 | 21.3770008 |
| H | 17.8740005 | 17.5809994 | 22.3740005 |
| H | 18.2870007 | 18.4759998 | 21.0890007 |
| N | 20.7700005 | 17.7520008 | 20.2460003 |
| C | 21.9860001 | 17.9990005 | 20.8020000 |
| O | 22.7019997 | 19.0279999 | 20.6089993 |
| H | 23.3379993 | 17.5529995 | 22.2819996 |
| O | 18.9930000 | 16.1159992 | 19.5949993 |
| H | 19.0809994 | 16.5830002 | 18.7859993 |
| H | 18.3379993 | 16.7570000 | 20.2789993 |

### **B-pathway. I1b structure**

|   |            |            |            |
|---|------------|------------|------------|
| N | 23.1320000 | 17.4349995 | 21.3619995 |
| C | 22.5879993 | 16.2570000 | 21.6140003 |
| H | 23.0760002 | 15.7320004 | 22.4740009 |
| C | 21.4340000 | 15.8760004 | 20.9309998 |
| H | 21.1459999 | 14.8439999 | 20.8840008 |
| C | 20.9610004 | 16.7590008 | 19.8999996 |
| N | 19.0650005 | 17.3040009 | 21.5139999 |
| H | 18.5079994 | 16.6149998 | 22.1870003 |
| H | 18.4899998 | 18.1520004 | 21.8110008 |
| N | 21.4650002 | 17.9580002 | 19.6980000 |
| C | 22.6240005 | 18.2549992 | 20.4379997 |
| O | 23.2380009 | 19.3519993 | 20.2350006 |
| H | 24.0039997 | 17.7250004 | 21.7229996 |
| O | 19.9230003 | 16.3570004 | 19.0130005 |
| H | 20.0499992 | 16.8379993 | 18.1410007 |
| H | 18.7910004 | 17.0540009 | 20.5599995 |

**B-pathway. TS2b structure**

|   |            |            |            |
|---|------------|------------|------------|
| N | 19.9029999 | 17.5660000 | 21.5699997 |
| C | 19.5620003 | 16.2649994 | 21.4500008 |
| H | 20.1900005 | 15.5270004 | 21.9860001 |
| C | 18.6709995 | 15.7980003 | 20.5410004 |
| H | 18.4410000 | 14.7159996 | 20.4500008 |
| C | 18.1930008 | 16.8320007 | 19.6389999 |
| N | 16.8959999 | 14.0360003 | 18.5359993 |
| H | 17.8230000 | 14.0310001 | 18.0669994 |
| H | 16.3199997 | 13.2720003 | 18.0990009 |
| N | 18.5419998 | 18.1030006 | 19.7679996 |
| C | 19.3799992 | 18.5860004 | 20.7530003 |
| O | 19.4769993 | 19.8020000 | 20.9860001 |
| H | 20.5300007 | 17.9139996 | 22.3010006 |
| O | 17.2749996 | 16.7880001 | 18.6840000 |
| H | 16.8040009 | 14.0000000 | 19.5900002 |
| H | 17.6879997 | 17.9860001 | 18.7549992 |

**B-pathway. U-A structure. Product**

|   |           |           |           |
|---|-----------|-----------|-----------|
| N | 20.152000 | 18.396000 | 21.170000 |
| C | 19.805000 | 17.040000 | 21.152000 |
| H | 20.326000 | 16.386000 | 21.821000 |
| C | 18.867000 | 16.607000 | 20.259000 |
| H | 18.705000 | 15.549000 | 20.188000 |
| C | 18.325000 | 17.498000 | 19.241000 |
| N | 18.603000 | 18.844000 | 19.410000 |
| C | 19.507000 | 19.337000 | 20.339000 |
| O | 19.786000 | 20.568000 | 20.392000 |
| H | 20.898000 | 18.685000 | 21.776000 |
| O | 17.558000 | 17.158000 | 18.340000 |
| H | 18.196000 | 19.596000 | 18.813000 |
| N | 15.187950 | 17.802420 | 21.877150 |
| H | 15.724090 | 17.001130 | 22.331380 |
| H | 15.776640 | 18.645530 | 21.957820 |
| H | 15.179290 | 17.682000 | 20.891680 |

**Table S3**

Enthalpies and free energies (in kcal·mol<sup>-1</sup>) in solution phase obtained from electronic structure calculations at PCM-M06-2X/6-311++G(d,p) level for all the mechanisms studied.

|                  | <b>Structure</b> | <b><math>\Delta H</math></b> | <b><math>\Delta G</math></b> |
|------------------|------------------|------------------------------|------------------------------|
| <b>A-pathway</b> | <b>TS1a</b>      | 14.99                        | 15.42                        |
|                  | <b>I1a</b>       | 5.64                         | 4.17                         |
|                  | <b>TS2a</b>      | 49.42                        | 50.39                        |
|                  | <b>I2a</b>       | 13.10                        | 14.84                        |
|                  | <b>TS3a</b>      | 44.87                        | 46.75                        |
|                  | <b>U-A</b>       | -3.18                        | -3.58                        |
| <b>B-pathway</b> | <b>TS1b</b>      | 56.99                        | 55.88                        |
|                  | <b>I1b</b>       | 6.96                         | 6.58                         |
|                  | <b>TS2b</b>      | 32.49                        | 31.50                        |
|                  | <b>U-A</b>       | -3.18                        | -3.58                        |
